# Supplementary material
Source: ML conference proceedings conference paper supplement (https://openreview.net/forum?id=BjPAuPVx8B)
Supplement: supplementary_material [file attachment]

# Supplementary Material for Noise-Aware Statistical Inference with Differentially Private Synthetic Data

## A Privacy theorems for NAPSU-MQ

The privacy bounds of the Gaussian mechanism depend on the *sensitivity* of the function  $f$ , which is an upper bound on the change in the value of  $f$  for neighbouring datasets.

**Definition A.1.** The  $L_2$ -sensitivity of a function  $f$  is  $\Delta_2 f = \sup_{X \sim X'} \|f(X) - f(X')\|_2$ .  $X \sim X'$  denotes that  $X$  and  $X'$  are neighbouring.

**Theorem A.2.** Let  $a$  be the concatenation of  $n_s$  full sets of marginal queries. Then  $\Delta_2 a \leq \sqrt{2n_s}$ .

*Proof.* Let  $a_1, \dots, a_{n_s}$  be the full sets of marginal queries that form  $a$ . Because all of the queries of  $a_i$  have the same set of variables, the vector  $a_i(x)$  has a single component of value 1, and the other components are 0 for any  $x \in \mathcal{X}$ . Then, for any neighbouring  $X, X' \in \mathcal{X}^n$ ,  $\|a_i(X) - a_i(X')\|_2^2 \leq 2$ . Then

$$\Delta_2 a = \sup_{X \sim X'} \|a(X) - a(X')\| \quad (5)$$

$$= \sup_{X \sim X'} \sqrt{\sum_{i=1}^{n_s} \|a_i(X) - a_i(X')\|_2^2} \quad (6)$$

$$\leq \sup_{X \sim X'} \sqrt{\sum_{i=1}^{n_s} 2} \quad (7)$$

$$= \sqrt{2n_s} \quad (8)$$

□

**Theorem A.3** (Balle and Wang [3]). The Gaussian mechanism for function  $f$  with  $L_2$ -sensitivity  $\Delta_2$  and noise variance  $\sigma^2$  is  $(\epsilon, \delta)$ -DP with

$$\delta \geq \Phi\left(\frac{\Delta_2}{2\sigma} - \frac{\epsilon\sigma}{\Delta_2}\right) - e^\epsilon \Phi\left(-\frac{\Delta_2}{2\sigma} - \frac{\epsilon\sigma}{\Delta_2}\right) \quad (9)$$

where  $\Phi$  is the cumulative distribution function of the standard Gaussian distribution.

## B Multiple Imputation

In order to compute uncertainty estimates for downstream analyses from the noise-aware posterior with NA+MI, we use Rubin's rules for synthetic data [30, 31].

After the synthetic datasets  $X_i^{Syn}$  for  $1 \leq i \leq m$  are released by the data holder, the data analyst runs their downstream analysis on each  $X_i^{Syn}$ . For each synthetic dataset, the analysis produces a point estimate  $q_i$  and a variance estimate  $v_i$  for  $q_i$ .

The estimates  $q_1, \dots, q_m$  and  $v_1, \dots, v_m$  are combined as follows [30]:

$$\bar{q} = \frac{1}{m} \sum_{i=1}^m q_i, \quad \bar{v} = \frac{1}{m} \sum_{i=1}^m v_i, \quad b = \frac{1}{m-1} \sum_{i=1}^m (q_i - \bar{q})^2. \quad (10)$$

We use  $\bar{q}$  as the combined point estimate, and set

$$T = \left(1 + \frac{1}{m}\right) b - \bar{v}, \quad T^* = \begin{cases} T & \text{if } T \geq 0 \\ \frac{n_{Syn}}{n} \bar{v} & \text{otherwise.} \end{cases} \quad (11)$$

321  $T$  an estimate of the combined variance.  $T$  can be negative, which is corrected using  $T^*$  instead [31].  
 322 We compute confidence intervals and hypothesis tests using the  $t$ -distribution with mean  $\bar{q}$ , variance  
 323  $T^*$ , and degrees of freedom

$$\nu = (m - 1)(1 - r^{-1})^2, \quad (12)$$

324 where  $r = (1 + \frac{1}{m})^{\frac{b}{v}}$  [31].

325 These combining rules apply when  $q$  is a univariate estimate. Reiter [32] derives appropriate  
 326 combining rules for multivariate estimates, which can be applied with NA+MI.

327 Rubin’s rules make many assumptions on the different distributions that are involved [30, 34], such  
 328 as the normality of the distribution of  $q_i$  when sampling data from the population. These assumptions  
 329 may not hold for some types of estimates, such as probabilities [23] or quantile estimates [40]. Further  
 330 work [12, 34] tries to reduce these assumptions, especially in the context of missing data. Their  
 331 results for synthetic data generation can be applied with our method.

332 Si and Reiter [34] propose to remove some of these assumptions by approximating the integral that  
 333 Rubin’s rules are derived from by sampling instead of using the analytical approximations in (10)  
 334 and (11). They find that their sampling-based approximation can be effective, especially with a small  
 335 number of datasets, but is computationally more expensive.

336 In the missing data context, when the downstream task uses Bayesian inference, Gelman et al. [12]  
 337 propose to mix the samples of each downstream posterior, and use the mixed posterior for inferences,  
 338 which doesn’t require the normality assumptions that Rubin’s rules require. However, this is restricted  
 339 to Bayesian downstream tasks, and was originally proposed for the missing data context, but it may  
 340 be applicable to synthetic data and our method.

## 341 B.1 Unbiasedness of Rubin’s Rules

342 Rubin’s rules make several assumptions on the downstream analysis method, and several normal  
 343 approximations when deriving the rules. Raghunathan, Reiter, and Rubin [30] derive conditions  
 344 under which Rubin’s rules give an unbiased estimate.

345 Rubin’s rules aim to estimate a quantity  $Q$  of the entire population  $P$ , of which  $X$  is a sample.  
 346 Conceptually, the sampling of the synthetic datasets is done in two stages: first, synthetic populations  
 347  $P_i^{Syn}$  for  $1 \leq i \leq m$  are sampled. Second, a synthetic dataset  $X_i^{Syn}$  is sampled from  $P_i^{Syn}$ .  
 348 This is equivalent to the sampling process for  $X_i^{Syn}$  described in Section 2, and makes stating the  
 349 assumptions of Rubin’s rules easier.

350 Let  $Q_i$  denote the quantity of interest  $Q$  computed from the synthetic population  $P_i^{Syn}$  instead of  $P$ .  
 351 Let  $V_i$  denote the sampling variance of  $q_i$  from the synthetic population  $P_i^{Syn}$ . Let  $\hat{Q}_D$  and  $\hat{U}_D$  be  
 352 the point and variance estimates of  $Q$  when sampling from the population  $P$ .

353 **Assumption B.1.** *For all  $1 \leq i \leq m$ ,  $q_i$  is unbiased for  $Q_i$  and asymptotically normal with respect*  
 354 *to sampling from the synthetic population  $P_i^{Syn}$ , with sampling variance  $V_i$ .*

355 **Assumption B.2.** *For all  $1 \leq i \leq m$ ,  $v_i$  is unbiased for  $V_i$ , and the sampling variability in  $v_i$  is*  
 356 *negligible. That is  $v_i \mid P_i^{Syn} \approx V_i$ . Additionally, the variation in  $V_i$  across the synthetic populations*  
 357 *is negligible.*

358 **Assumption B.3.**  $\hat{Q}_D \mid P \sim \mathcal{N}(Q, \hat{U}_D)$

359 Assumptions [B.1][B.3] ensure that the downstream analysis method used to estimate  $Q$  is accurate, for  
 360 both point and variance estimates, when applied to real data, regardless of the population.

361 **Assumption B.4.**  $Q_i \mid X \sim \mathcal{N}(\hat{Q}_D, \hat{U}_D)$

362 Assumption [B.4] requires that the generation of synthetic datasets does not bias the downstream  
 363 analysis. For query-based methods like NAPSU-MQ, it may not hold when the queries do not contain  
 364 the relevant information for the downstream task.

365 With Assumptions [B.1][B.4], Raghunathan, Reiter, and Rubin [30] show that  $\bar{q}$  is an unbiased estimate  
 366 of  $Q$ , and  $T$  in an asymptotically unbiased variance estimate.

367 **Theorem B.5** (Raghunathan, Reiter, and Rubin [30]). *Assumptions [B.1][B.4] imply that*

- 368 1.  $E(\bar{q} \mid P) = Q$ ,
- 369 2.  $E(T \mid P) = \text{Var}(\bar{q} \mid P)$ ,
- 370 3. Asymptotically  $\frac{\bar{q}-Q}{\sqrt{T}} \sim \mathcal{N}(0, 1)$ ,
- 371 4. For moderate  $m$ ,  $\frac{\bar{q}-Q}{\sqrt{T}} \sim t_\nu(0, 1)$  [31].

## 372 C Finding an Identifiable Parameterisation

373 In this section, we describe the process we use to ensure the parameterisation of the posterior in  
 374 NAPSU-MQ is identifiable. We ensure identifiability by dropping some of the selected queries,  
 375 chosen using the the canonical parameterisation of MED $_\theta$  to ensure no information is lost. First,  
 376 we give some background on Markov networks, which is necessary to understand the canonical  
 377 parameterisation.

378 **Markov Networks** A Markov network is a representation of a probability distribution that is  
 379 factored according to an undirected graph. Specifically, a Markov network distribution  $P$  is a product  
 380 of *factors*. A factor is a function from a subset of the variables to non-negative real numbers. The  
 381 subset of variables is called the *scope* of the factor. The joint distribution is given by

$$P(x) = \frac{1}{Z} \prod_{I \in S} \phi_I(x_I) \quad (13)$$

382 where  $S$  is the set of scopes for the factors. The undirected graph is formed by representing each  
 383 variable as a node, and adding edges such that the scope of each factor is a clique in the graph.

384 **Canonical Parametrisation** The canonical parametrisation is given in terms of *canonical fac-*  
 385 *tors* [1]. The canonical factors depend on an arbitrary assignment of variables  $x^*$ . We simply choose  
 386  $x^* = (0, \dots, 0)$ . In the following,  $x_U$  denotes the selection of components in the set  $U$  from the  
 387 vector  $x$ , and  $x_{-U}$  denotes the selection of all components except those in  $U$ .

388 **Definition C.1.** A canonical factor  $\phi_D^*$  with scope  $D$  is defined as

$$\phi_D^*(x) = \exp \left( \sum_{U \subseteq D} (-1)^{|D-U|} \ln P(x_U, x_{-U}^*) \right)$$

389 The sum is over all subsets of  $D$ , including  $D$  itself and the empty set.  $|D - U|$  is the size of the set  
 390 difference of  $D$  and  $U$ .

391 **Theorem C.2** (Abbeel, Koller, and Ng [1] (Theorem 3)). Let  $P$  be a Markov network with factor  
 392 scopes  $S$ . Let  $S^* = \cup_{D \in S} P(D) - \emptyset$ . Then

$$P(x) = P(x^*) \prod_{D^* \in S^*} \phi_{D^*}^*(x_{D^*})$$

393 There are more canonical factors than original factors, so it might seem that there are more parameters  
 394 in the canonical parametrisation than in the original parametrisation. However, many values in the  
 395 canonical factors turn out to be ones. We can select the queries corresponding to non-one canonical  
 396 factor values to obtain a set of queries with the same information as the original queries, but without  
 397 linear dependencies [19]. We call this set of queries the *canonical queries*.

398 Many of the canonical factor scopes are subsets of the original factor scopes, so using the canonical  
 399 queries as is would introduce new marginal query sets and potentially increase the sensitivity of the  
 400 queries. As all of the new queries are sums of existing queries, we can replace each new query with  
 401 the old queries that sum to the new query, and use the same  $\theta$  value for all of the added queries to  
 402 preserve identifiability. If one of the added queries was already included, it does not need to be added  
 403 again, because two instances of a single query can be collapsed into a single instance with it's own  
 404 parameter value. Because of this, we did not need to fix the  $\theta$  values of any queries to the same value  
 405 in the settings we studied.

## D NAPSU-MQ vs. PGM

The PGM algorithm [27] generates synthetic data based on the same marginal queries  $a$  and noise addition as NAPSU-MQ. PGM also models the original data using the  $\text{MED}_\theta$  distribution. Unlike NAPSU-MQ, PGM finds the parameters  $\theta$  by minimising the  $l_2$ -distance  $\|\tilde{s} - n\mu(\theta)\|_2$  between the observed noisy query values  $\tilde{s}$  and the expected query values  $n\mu(\theta) = nE_{x \sim \text{MED}_\theta}(a(x))$ . In the following, we'll replace the query values  $s$  and  $\tilde{s}$  that are summed over datapoints with  $u = \frac{s}{n}$  and  $\tilde{u} = \frac{\tilde{s}}{n}$  that represent mean query values over datapoints. Then the PGM objective is equivalent to  $\|\tilde{u} - \mu(\theta)\|_2$ .

We can view the PGM minimisation problem as a maximum likelihood estimation in the NAPSU-MQ probabilistic model

$$X \sim \text{MED}_\theta^n, \quad s = a(X), \quad \tilde{s} \sim \mathcal{N}(s, \sigma_{DP}^2 I), \quad (14)$$

where we replace normal approximation that NAPSU-MQ uses with a law of large numbers approximation. Specifically, first replace  $s$  with  $u$  in (14):

$$X \sim \text{MED}_\theta^n, \quad u = \frac{a(X)}{n}, \quad \tilde{u} \sim \mathcal{N}(u, \sigma_{DP}^2 I/n^2). \quad (15)$$

Because  $u$  is a mean of sufficient statistics for individual datapoints, by the law of large numbers, asymptotically  $u \sim \delta_{\mu(\theta)}$ . With this approximation, the probabilistic model is

$$u \sim \delta_{\mu(\theta)}, \quad \tilde{u} \sim \mathcal{N}(u, \sigma_{DP}^2 I/n^2). \quad (16)$$

$u$  can be marginalised from the likelihood of this model:

$$p(\tilde{u}|\theta) = \int p(\tilde{u}, u|\theta) du \quad (17)$$

$$= \int p(\tilde{u}|u)p(u|\theta) du \quad (18)$$

$$= \int \mathcal{N}(\tilde{u}|u, \sigma_{DP}^2 I/n^2) \delta_{\mu(\theta)}(u) du \quad (19)$$

$$= \mathcal{N}(\tilde{u}|\mu(\theta), \sigma_{DP}^2 I/n^2) \quad (20)$$

The marginalised log-likelihood is then

$$\ln p(\tilde{u}|\theta) = -\frac{n^2}{\sigma_{DP}^2} \|\tilde{u} - \mu(\theta)\|_2^2 + \text{constant}, \quad (21)$$

so maximising the log-likelihood is equivalent to minimising the PGM objective.

If we made a normal approximation instead of the law of large numbers approximation in (15), we would get

$$\tilde{u} \sim \mathcal{N}(\mu(\theta), \Sigma(\theta)/n + \sigma_{DP}^2 I/n^2), \quad (22)$$

so maximising the likelihood is still possible. Unlike PGM, this maximum likelihood objective includes the covariance  $\Sigma(\theta)$ . We leave any comparisons between maximising this objective and PGM to future work.

## E Hyperparameters

**NAPSU-MQ** The hyperparameters of NAPSU-MQ are the choice of prior, choice of inference algorithm, and the parameters of that algorithm. For the toy data experiment, we used the Laplace approximation for inference, which approximates the posterior with a Gaussian centered at the maximum a posteriori estimate (MAP). We find the MAP for the Laplace approximation with the LBFGS optimisation algorithm, which we run until the loss improves by less than  $10^{-5}$  in an iteration, up to a maximum of 500 iterations. Sometimes LBFGS failed to converge, which we detect by checking if the loss increased by over 1000 in one iteration, and fix by restarting optimisation from a different starting point. We also restarted if the maximum number of iterations was reached without convergence. For almost all runs, no restarts were needed, and at most 2 were needed.

For the Adult experiment, we used NUTS [15]. We ran 4 chains of 800 warmup samples and 2000 kept samples. We set the maximum tree depth of NUTS to 12. We normalised the posterior using the mean and covariance from the Laplace approximation. For the Laplace approximation, we used the same hyperparameters as with the toy data set, except we set the maximum number of iterations to 6000.

For the prior, we used a Gaussian distribution with mean 0 and standard deviation 10 for all components, without dependencies between components, for both experiments.

**PGM and Repeated PGM** PGM finds the  $\text{MED}_\theta$  parameters  $\theta$  that minimise the  $L_2$ -error between the expected query values and the noisy query values. The PGM implementation offers several algorithms for this optimisation problem, but we found that the default algorithm and number of iterations works well for both experiments.

**RAP** RAP minimises the error on the selected queries of a continuous relaxation of the discrete synthetic dataset. After the optimal relaxed synthetic dataset is found, a discrete synthetic dataset is constructed by sampling. This gives two hyperparameters that control the size of the synthetic data: the size of the continuous dataset, and the number of samples for each datapoint in the continuous relaxation. We set the size of the continuous dataset to 1000 for both experiments, as recommended by the paper [2]. For the Adult data experiment, we set the number of samples per datapoint to 46, so that the total size of the synthetic dataset is close to the size of the original dataset. For the toy data experiment, we set the number of samples per datapoint to 50. The RAP paper [2] finds that much smaller values are sufficient, but higher values should only increase accuracy.

In both cases, we weight the synthetic datapoints by  $\frac{n}{n_{\text{syn}}}$  before the downstream logistic regression to ensure that the logistic regression does not over- or underestimate variances because of a different sample size from the original data.

RAP also has two other hyperparameters that are relevant in our experiments: the number of iterations and the learning rate for the query error minimisation. After preliminary runs, we set the learning rate at 0.1 for both experiments, and set the number of iterations to 5000 for the toy data experiment, and 10000 for the Adult data experiment.

**PEP** PEP has two hyperparameters: the number of iterations used to find a distribution with maximum entropy that has approximately correct query values, and the allowed bound on the difference of the query values. The PEP implementation hardcodes the allowed difference to 0. We set the number of iterations to 1000 after preliminary runs for both experiments.

**PrivLCM** PrivLCM samples the posterior of a Bayesian latent class model, where the number of classes is limited to make inference tractable. The model has hyperparameters for the prior, and the number of latent classes. We leave the prior hyperparameters to their defaults, and set the number of latent classes to 10, which the PrivLCM authors used in a 5-dimensional binary data experiment [29]. The remaining hyperparameter of PrivLCM is the number of posterior samples that are obtained. To keep the runtime of PrivLCM manageable, we set the number of samples to 500 after ensuring that the lower number of samples did not degrade the accuracy of the estimated probabilities for the joint distribution compared to using the default of 5000 samples.

## F Toy Data Experiment Details

To demonstrate the necessity of noise-awareness in synthetic data generation, we measure the coverage of confidence intervals computed from DP synthetic data on a generated toy dataset where the data generation process is known. We test the existing algorithms PGM [27], PEP [21], RAP [2], PrivLCM [29] and our pipeline NA+MI, where data generation is implemented with NAPSU-MQ. The authors of PrivLCM also propose using multiple imputation [29], so we use Rubin’s rules [30] with the output of PrivLCM.

The original data consists of  $n = 2000$  datapoints of 3 binary variables. The first two are sampled by independent coinflips. The third is sampled from logistic regression on the other two variables with coefficients (1, 0).

For all algorithms except PrivLCM, we use the full set of 3-way marginal queries released with the Gaussian mechanism. PrivLCM doesn't implement these, and instead uses all full sets of 2-way marginals, and a different mechanism, which is  $(\epsilon, 0)$ -DP [29] instead of  $(\epsilon, \delta)$ -DP like the other algorithms. We use the Laplace approximation for NAPSU-MQ inference, as it is much faster than NUTS and works well for this simple setting.

For the privacy bounds, we use  $\delta = n^{-2}$ , and vary  $\epsilon$ . We generate  $m = 100$  synthetic datasets of size  $n_{syn} = n$  for all algorithms except RAP, where the synthetic dataset size is a function of two hyperparameters. We describe the hyperparameters in detail in Supplemental Section E.

The downstream task is inferring the logistic regression coefficients from synthetic data. We repeated all steps 100 times to measure the probability of sampling a dataset giving a confidence interval that includes the true parameter values.

Figure 1 shows the coverages, and Figure 3a shows the widths for the resulting confidence intervals. All of the algorithms apart from ours and PrivLCM are overconfident, even with very loose privacy bounds. Examining the confidence intervals shows the reason: PGM is unbiased, but it produces too narrow confidence intervals, while NAPSU-MQ produces wider confidence intervals. On the other hand, for  $\epsilon > 0.25$ , PrivLCM produces much wider and too conservative confidence intervals.

## G Adult Experiment Details

We include the columns Age, Workclass, Education, Marital Status, Race, Gender, Capital gain, Capital loss, Hours per week and Income of the Adult dataset, and discard the rest to remove redundant columns and keep computation times manageable. We discretise Age and Hours per week to 5 buckets, and discretise Capital gain and Capital loss to binary values indicating whether their value is positive. The Income column is binary from the start, and indicates whether a person has an income  $> \$50\,000$ .

In the downstream logistic regression, we use income as the dependent variable, and Age, Race and Gender as independent variables. Age is transformed back to a continuous value for the logistic regression by picking the middle value of each discretisation bucket. We did not use all variables for the downstream task, as a smaller set of variables allows including the relevant marginals for synthetic data generation.

For the input queries, we include the 2-way marginals with Hours per week and each of the independent variables Age, Race and Gender and income, as well as the 2-way marginal between Race and Gender. The rest of the queries were selected with the MST algorithm [25]. For MST, we used  $\epsilon = 0.5$ , but we do not include this in our figures, as we focus on the synthetic data generation, not query selection. The selected queries are shown in Figure S1. The selection is very stable: in 100 repeats of query selection, these queries were selected 99 times.

We chose the number of generated synthetic datasets for NAPSU-MQ and the number of repeats for repeated PGM by comparing the results of the Adult experiment for different choices. The results are shown in Figure S4 for NAPSU-MQ and Figure S2 for repeated PGM. We chose  $m = 10$  for NAPSU-MQ because it had slightly better calibration than the other values, and  $m = 5$  repeats for repeated PGM because it had the best calibration overall.

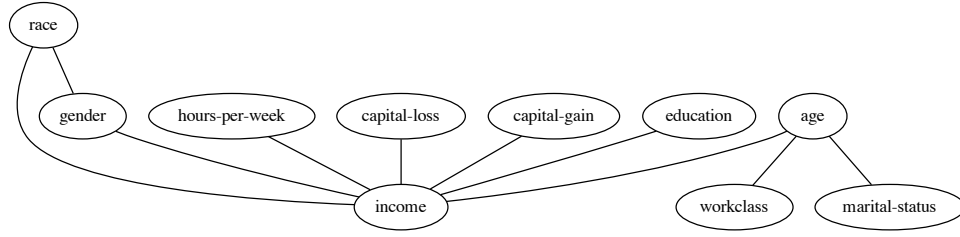

Figure S1: Markov network of selected queries for the Adult experiment. Each edge in the graph represents a selected 2-way marginal.

## 526 H Extra Results

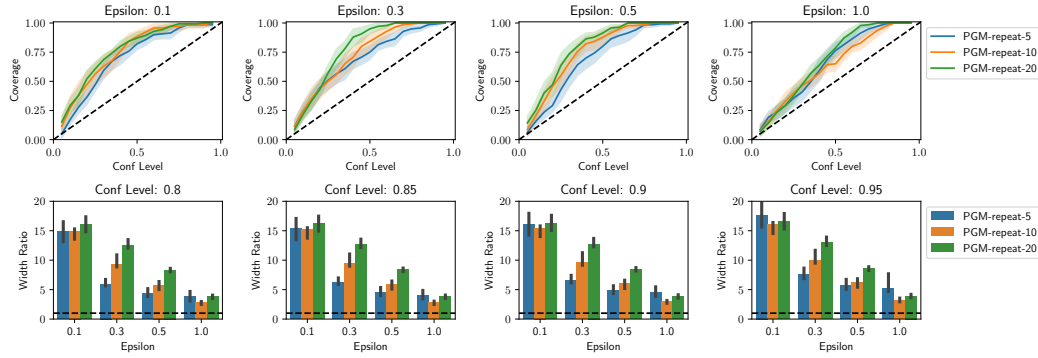

Figure S2: Comparison of different numbers of repetitions for repeated PGM. We chose  $m = 5$  repeats to represent repeated PGM in the main experiment, although the differences between the numbers of repeats are small.

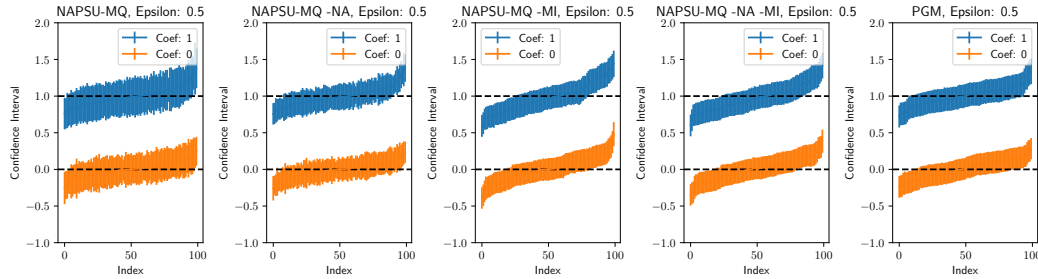

Figure S3: Ablation Study Confidence Intervals



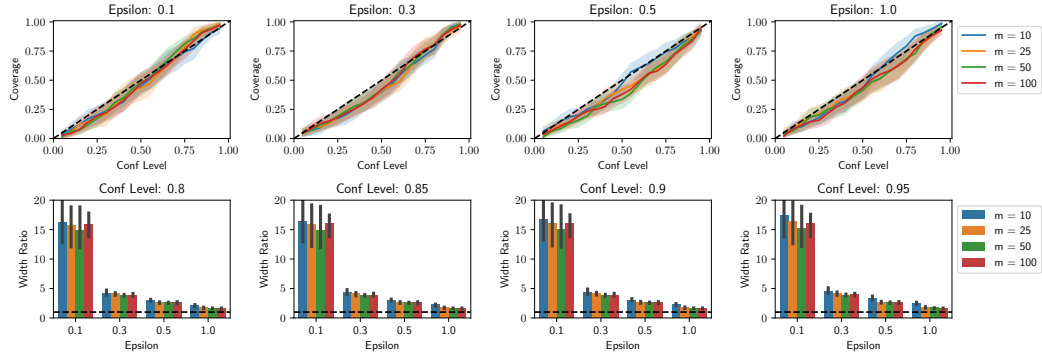

Figure S4: Comparison of different numbers of generated synthetic datasets for NAPSU-MQ. The differences are small, but  $m = 10$  synthetic datasets has the best calibration, so we chose it for the main experiment.

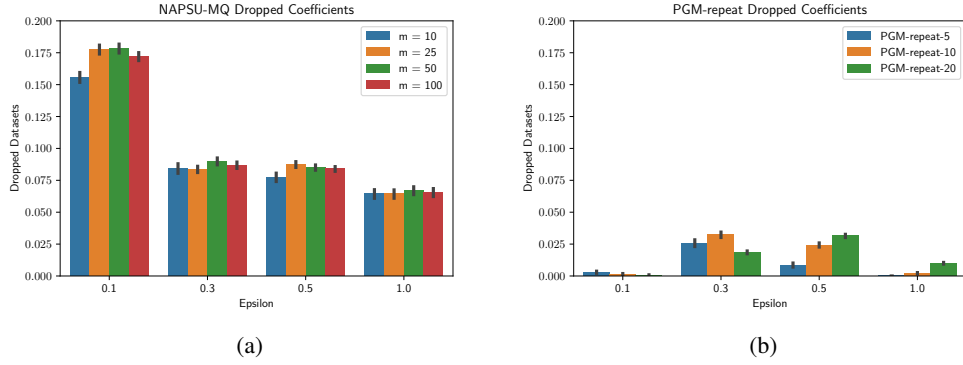

Figure S5: The fraction of coefficients dropped before Rubin's rules because of very high estimated variances from the downstream logistic regression in the Adult data experiment for NAPSU-MQ in (a) and PGM-repeat in (b).

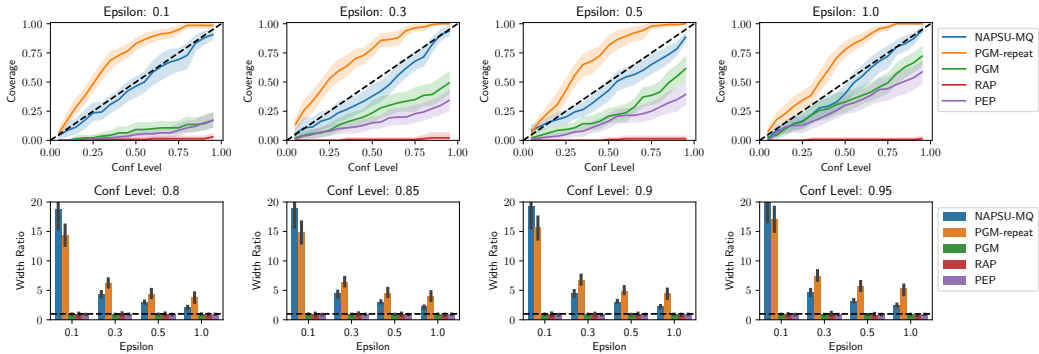

Figure S6: Results from the Adult data experiment with regularised logistic regression instead of removing very high variance estimates. The results are almost identical to Figure 4 except for RAP, which suffers from the regularisation. The regularisation is  $l_2$  with a very small multiplier of 0.00001. Variances for the downstream task are estimated with bootstrapping using 50 bootstrap samples.



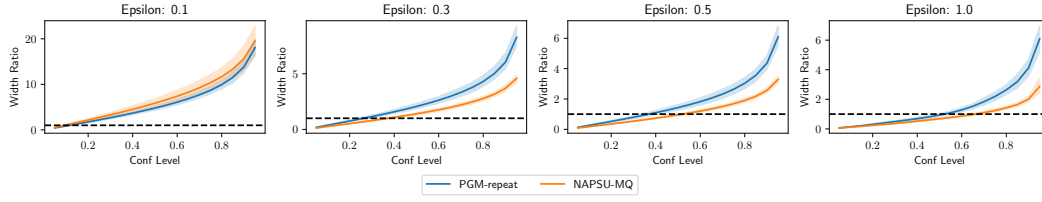

Figure S7: The tradeoff between the confidence level for DP confidence intervals and the width of the intervals. The width ratio on the y-axis is with regards to the original 95% confidence interval, for all confidence levels, so the plot shows how much must the confidence level drop to obtain the same width from a DP confidence interval as a non-DP one. The horizontal line at  $y = 1$  shows this point. For  $\epsilon = 1$ , the confidence level for NAPSU-MQ must be dropped to about 65%, and for PGM-repeat, it must be dropped to about 50%.

Table S1: Runtimes of each inference run for the Adult experiment. Does not include the time taken to generate synthetic data, or run any downstream analysis. The LA rows record the runtime for obtaining the Laplace approximation for NAPSU-MQ that is used in the NUTS inference, so the total runtime for a NAPSU-MQ run with NUTS is the sum of the LA and NUTS rows. Experiments were run on 4 CPU cores of a cluster.

| Algorithm     | Epsilon | Mean            | Standard Deviation |
|---------------|---------|-----------------|--------------------|
| LA            | 0.1     | 2 min 53 s      | 18.5 s             |
|               | 0.3     | 3 min 53 s      | 29.4 s             |
|               | 0.5     | 3 min 38 s      | 35.0 s             |
|               | 1.0     | 3 min 25 s      | 25.5 s             |
| NUTS          | 0.1     | 9 h 59 min 6 s  | 6506 s             |
|               | 0.3     | 7 h 33 min 28 s | 2701 s             |
|               | 0.5     | 4 h 57 min 40 s | 3185 s             |
|               | 1.0     | 3 h 51 min 34 s | 1274 s             |
| PEP           | 0.1     | 6 min 50 s      | 25.4 s             |
|               | 0.3     | 7 min 18 s      | 31.2 s             |
|               | 0.5     | 7 min 0 s       | 33.1 s             |
|               | 1.0     | 7 min 7 s       | 33.7 s             |
| PGM           | 0.1     | 15 s            | 0.5 s              |
|               | 0.3     | 17 s            | 1.5 s              |
|               | 0.5     | 15 s            | 0.4 s              |
|               | 1.0     | 15 s            | 0.6 s              |
| PGM-repeat-10 | 0.1     | 2 min 35 s      | 3.3 s              |
|               | 0.3     | 2 min 53 s      | 13.0 s             |
|               | 0.5     | 2 min 37 s      | 5.0 s              |
|               | 1.0     | 2 min 36 s      | 4.4 s              |
| PGM-repeat-20 | 0.1     | 5 min 15 s      | 10.9 s             |
|               | 0.3     | 5 min 58 s      | 28.4 s             |
|               | 0.5     | 5 min 10 s      | 10.2 s             |
|               | 1.0     | 5 min 13 s      | 12.6 s             |
| PGM-repeat-5  | 0.1     | 1 min 17 s      | 2.7 s              |
|               | 0.3     | 1 min 28 s      | 6.7 s              |
|               | 0.5     | 1 min 18 s      | 2.6 s              |
|               | 1.0     | 1 min 18 s      | 1.9 s              |
| RAP           | 0.1     | 32 s            | 2.4 s              |
|               | 0.3     | 34 s            | 2.2 s              |
|               | 0.5     | 32 s            | 2.1 s              |
|               | 1.0     | 31 s            | 2.1 s              |

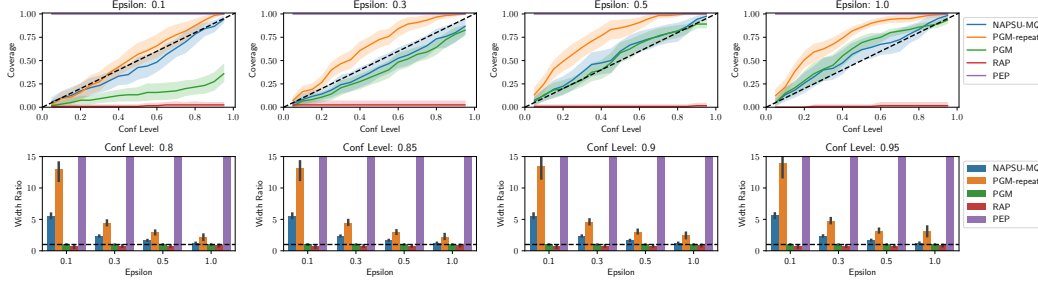

Figure S8: Results for the US Census experiment, showing that only NAPSU-MQ and PGM-repeat are calibrated for both values of  $\epsilon$ , and NAPSU-MQ produces significantly narrower confidence intervals than PGM-repeat. Like Figure 4, the top row shows the mean coverage over all coefficients and 20 runs for different confidence levels. The bottom row shows median confidence interval widths divided by real data confidence interval widths.

## 527 I US Census Data Experiment

528 We conducted an additional experiment on US Census data provided by the UCI repository [28]. We  
 529 limited the data to individuals who have served in the US Military, and picked 9 columns<sup>2</sup> most  
 530 relating to military service. Even this subset of the data is large, with  $n = 320\,754$ . All columns are  
 531 discrete, and have 10 800 possible values, much fewer than the Adult experiment.

532 As the downstream task, we use logistic regression with iPoverty as the dependent variable and iSex,  
 533 iKorean, iVietnam and iMilitary as the independent variables. iPoverty has three categories, so we  
 534 combine the two categories denoting people below the poverty line to make the dependent variable  
 535 binary for the logistic regression, but not synthetic data generation.

536 As our queries we use 4 three-way marginals covering the independent and dependent variables,  
 537 and 3 two-way marginals that include the other variables that are synthesised, but not included in  
 538 the regression. As the published implementation of RAP [2] does not support a mix of two- and  
 539 three-way marginals, we replace the two-way marginals with three-way marginals for RAP. As in the  
 540 Adult experiment, we set  $\delta = n^{-2}$ , and vary  $\epsilon$ .

541 As in the adult experiment, we use  $n_{Syn} = n$  for all algorithms except RAP. For PGM-repeat and  
 542 NAPSU-MQ, we choose  $m$  with a preliminary experiment. For NAPSU-MQ, we set  $m = 100$ ,  
 543 although the differences between the choices are not large. For PGM-repeat, we set  $m = 10$ . We set  
 544 the other hyperparameters for all algorithms after testing runs to the same values used in the Adult  
 545 experiment, except we increased the number of optimisation iterations for PGM to 5000 from the  
 546 default of 1000, and dropped the number of NUTS chains to 2 and the number of warmup samples  
 547 to 400 for NAPSU-MQ. We did not use the trick of dropping estimates with very high variances, or  
 548 using very small regularisation in the logistic regression with the US Census data.

549 The results are shown in Figure S8. While PGM is calibrated with  $\epsilon = 1$ , it is severely overconfident  
 550 with  $\epsilon = 0.1$ . This is likely caused by the large size of the dataset: at  $\epsilon = 1$ , there is little noise  
 551 compared to the large sample size, while at  $\epsilon = 0.1$ , the noise has a clear effect.

552 NAPSU-MQ and PGM-repeat are able to produce calibrated results at  $\epsilon = 0.1$ . Of these, NAPSU-MQ  
 553 produces clearly narrower confidence intervals for both values of  $\epsilon$ .

554 For some reason, PEP fails completely with this dataset. We are not sure what causes this, as the  
 555 algorithm should work in this setting as well as it did with the Adult dataset, and the size of the  
 556 dataset should not be an issue.

557 The runtimes for each algorithm are shown in Table S2. The difference between PGM-repeat and  
 558 NAPSU-MQ is much smaller than in the Adult data experiment, but is still large. Note that the  
 559 runtimes are not comparable the Adult experiment runtimes in Table S1, as we could not use the  
 560 cluster that was used in the Adult experiment due to technical issues.

<sup>2</sup> The columns are dYrsserv, iSex, iVietnam, iKorean, iMilitary, dPoverty, iMobillim, iEnglish and iMarital.

Table S2: Runtimes of each inference run for the US Census experiment. Does not include the time taken to generate synthetic data, or run any downstream analysis. The LA rows record the runtime for obtaining the Laplace approximation for NAPSU-MQ that is used in the NUTS inference, so the total runtime for a NAPSU-MQ run with NUTS is the sum of the LA and NUTS rows. The experiment was run on a M1 Macbook Air, because we could not use the cluster that was used for the Adult experiment due to technical issues. This means that the runtimes are not comparable to the Adult data experiment runtimes.

| Algorithm     | Epsilon | Mean        | Standard Deviation |
|---------------|---------|-------------|--------------------|
| LA            | 0.1     | 42 s        | 11.3 s             |
|               | 1.0     | 52 s        | 24.6 s             |
| NUTS          | 0.1     | 49 min 3 s  | 667 s              |
|               | 1.0     | 21 min 25 s | 255 s              |
| PEP           | 0.1     | 11 s        | 2.6 s              |
|               | 1.0     | 12 s        | 2.4 s              |
| PGM           | 0.1     | 28 s        | 5.6 s              |
|               | 1.0     | 29 s        | 4.9 s              |
| PGM-repeat-10 | 0.1     | 4 min 53 s  | 52.6 s             |
|               | 1.0     | 4 min 57 s  | 54.6 s             |
| PGM-repeat-5  | 0.1     | 2 min 12 s  | 17.9 s             |
|               | 1.0     | 2 min 27 s  | 34.8 s             |
| RAP           | 0.1     | 21 s        | 4.7 s              |
|               | 1.0     | 19 s        | 2.9 s              |
